# Supplementary material
Source: publisher figshare collection journal article supplement (https://adisjournals.figshare.com/articles/dataset/_/14541393)
Supplement: Supplementary file 1 [file 2]

# Individual Participant Symptom Responses to Intra-Articular Lorecivivint in Knee Osteoarthritis: Post Hoc Analysis of a Phase 2B Trial

Cite This Article As: Tambiah J, Kennedy S, Swearingen C, Simsek I, Yazici Y, Farr J, Conaghan P  
<https://doi.org/10.1007/s40744-021-00316-w>

WORLDWIDE PREVALENCE OF KNEE  
OSTEOARTHRITIS IS ALMOST 4%

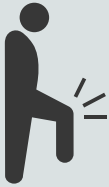

## Purpose

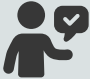

Determine the clinically important pain and function responses to lorecivivint in participants with knee OA

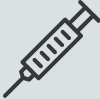

## Lorecivivint

1st in class investigational intra-articular injection that is an inhibitor of CLK2 and DYRK1A modulating the Wnt and inflammatory pathways

## Key Findings

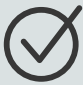

Participants receiving lorecivivint were statistically more likely to achieve at least a 30% improvement in pain compared to placebo at 12 and 24 weeks

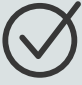

Safety was similar between lorecivivint and placebo

## Pain Responder Rates

Lorecivivint  
64.3%

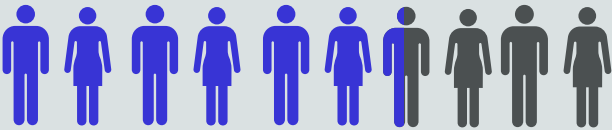

Placebo  
42.2%

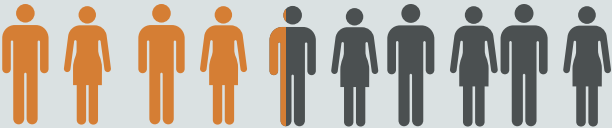

**LORECIVIVINT-TREATED  
PARTICIPANTS EXPERIENCED CLINICALLY  
MEANINGFUL IMPROVEMENTS  
IN PAIN AND FUNCTION**

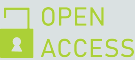

The infographic represents opinions of the authors. For a full list of declarations, including funding and author disclosure statements, please see the full text online.  
© The authors, CC-BY-NC 2021

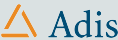

PEER-REVIEWED  
INFOGRAPHIC
